# Supplementary material for: Deterministic multi-qubit entanglement in a quantum network
Source: Springer Nature journal article supplement (doi:10.1038/s41586-021-03288-7), 2021-02-24
Supplement: 41586_2021_3288_MOESM1_ESM.pdf [file 41586_2021_3288_MOESM1_ESM.pdf]

**Supplementary information**

---

**Deterministic multi-qubit entanglement in a quantum network**

---

In the format provided by the authors and unedited

1 **Supplementary Information for “Deterministic multi-qubit**  
2 **entanglement in a quantum network”**

3 Youpeng Zhong,<sup>1,\*</sup> Hung-Shen Chang,<sup>1</sup> Audrey Bienfait,<sup>1,†</sup> Étienne Dumur,<sup>1,2,‡</sup>

4 Ming-Han Chou,<sup>1,3</sup> Christopher R. Conner,<sup>1</sup> Joel Grebel,<sup>1</sup> Rhys G.

5 Povey,<sup>1,3</sup> Haoxiong Yan,<sup>1</sup> David I. Schuster,<sup>3,1</sup> and Andrew N. Cleland<sup>1,2,§</sup>

6 <sup>1</sup>*Pritzker School of Molecular Engineering,*

7 *University of Chicago, Chicago IL 60637, USA*

8 <sup>2</sup>*Center for Molecular Engineering and Material Science Division,*

9 *Argonne National Laboratory, Argonne IL 60439, USA*

10 <sup>3</sup>*Department of Physics, University of Chicago, Chicago IL 60637, USA*

## 11 I. DEVICE FABRICATION

12 The device fabrication recipe is adapted from Refs. 1–3, with some modifications to  
13 simplify the fabrication of the air-bridge crossovers.

14 Fabrication steps preceding definition of the qubit and coupler Josephson junctions are  
15 done on a 100 mm-diameter sapphire wafer. The wafer is then cut into four quarters,  
16 allowing for more attempts for the more delicate junction fabrication.

- 17 1. 100 nm Al base layer deposition using electron beam evaporation.
- 18 2. Base layer photolithography and dry etch with  $\text{BCl}_3/\text{Cl}_2/\text{Ar}$  inductively coupled  
19 plasma (ICP). This defines the qubit capacitors, the tunable coupler wiring, and the  
20 readout and control circuitry.
- 21 3. 200 nm crossover scaffold  $\text{SiO}_2$  deposition using photolithography, electron beam evap-  
22 oration and liftoff.
- 23 4. 10 nm/150 nm Ti/Au alignment mark layer deposition using photolithography, elec-  
24 tron beam evaporation and liftoff.
- 25 5. Josephson junction deposition using the Dolan bridge method [4] using shadow evap-  
26 oration and liftoff, using a PMMA/MAA bilayer and electron beam lithography. The  
27 Al evaporated in this step does not have any galvanic contact with the base layer  
28 wiring.
- 29 6. 300 nm crossover and bandage layer: Al liftoff deposition, preceded by an *in situ* Ar ion  
30 mill. This step [5] creates the top Al layer for crossovers, as well as establishes galvanic  
31 connections between the base wiring Al from step 1 and the Josephson junctions  
32 defined in step 5.
- 33 7. Vapor HF etch to remove the  $\text{SiO}_2$  scaffold underlying the Al crossovers from step 3.

---

\* Present Address: Shenzhen Institute for Quantum Science and Engineering, Southern University of Science and Technology, Shenzhen 518055, China

† Present Address: Université de Lyon, ENS de Lyon, Université Claude Bernard, CNRS, Laboratoire de Physique, F-69342 Lyon, France

‡ Present Address: Université Grenoble Alpes, CEA, INAC-Pheligs, 38000 Grenoble, France

§ Corresponding author; anc@uchicago.edu

34 We use 0.9  $\mu\text{m}$  I-line photoresist AZ MiR 703 for all photolithography steps. The base  
 35 layer lithography (step 2) uses AZ 300 MIF developer. The other steps (step 3, 4 and 6)  
 36 use AZ 1:1 developer, which does not attack aluminum. Because the  $\text{SiO}_2$  scaffold layer  
 37 (step 3) and the crossover layer (step 6) here involve much thinner deposited layers than  
 38 those in Refs. 1 and 3, a thick layer of AZ 703 photoresist is sufficient for the lift-off process,  
 39 which greatly simplifies the fabrication recipe, as compared to the use of tri-layer positive  
 40 photoresist in Ref. 3 or negative photoresist in Ref. 1. Furthermore, the crossover layer is  
 41 now merged with the bandage layer [5] (step 6) here, further simplifying the fabrication  
 42 process. Note the air-bridge is mechanically fragile and cannot sustain sonication.

## 43 II. CABLE-CHIP WIREBOND CONNECTIONS

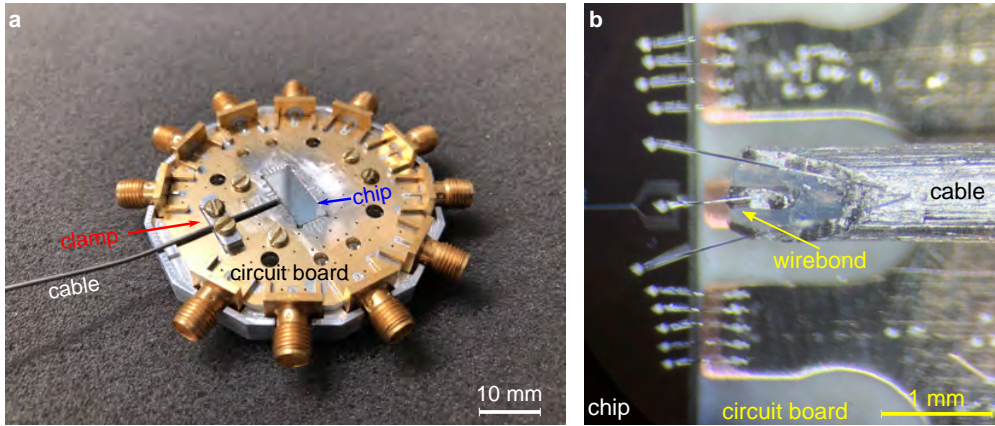

Figure S1. Cable-chip wirebond connection. **a**, Image of the sample holder consisting of a gold-plated printed circuit board, non-magnetic SMA connectors and an aluminum enclosure (the top part of which is removed here). The NbTi cable is held close to the chip, then firmly clamped to the sample holder. **b**, Image showing the wirebond connection between the coaxial cable and the processor chip.

44 In this experiment, we use a 1 meter long niobium-titanium (NbTi) superconducting  
 45 coaxial cable (manufacturer: COAX CO., LTD., part number: SC-086/50-NbTi-NbTi) to  
 46 connect the two superconducting quantum processors. To achieve a high-quality communica-  
 47 tion channel connection, we avoid the use of normal-metal connectors (e.g. SMA connectors)  
 48 and instead use 25  $\mu\text{m}$  diameter aluminum wirebonds to connect the cable directly to the  
 49 superconducting processor chip. A sample holder specifically designed for this purpose is

50 used here, as shown in Fig. S1a. The NbTi coaxial cable is held close to the processor chip  
 51 and then firmly clamped on the sample holder with a clamp. The top part of the outer  
 52 conductor and the PTFE dielectric is removed with a sharp blade to expose the inner con-  
 53 ductor at the end of the cable, as shown in Fig. S1b. The top surfaces of the inner and outer  
 54 conductors are carefully scraped with a sharp blade to create a flat surface for wirebonding.  
 55 We note that niobium and its alloys are difficult to wirebond or solder to, due to the hard  
 56 native oxide layer that forms naturally on the cable surface. In particular, wirebonding to  
 57 the 0.2 mm diameter rounded surface of the inner conductor is especially challenging.

58 The quality factor of the communication channel varies in different assembled devices,  
 59 depending strongly on the quality of the wirebond connection. To further explore the loss  
 60 mechanism in the communication channel, we performed a separate cable test experiment,  
 61 where we directly wirebond the NbTi cable to a short coplanar waveguide (CPW) line of  
 62 length  $\ell_c \approx 3$  mm on a test chip, see Fig. S2. A network analyzer measurement is carried  
 63 out [6], yielding the quality factor  $Q$  of each standing mode (blue dots). We observe a clear  
 64 trend of  $Q$  increasing with frequency in this cable test. For comparison, we also plot the  
 65  $Q$  of the standing modes measured in the experiment in the main text (orange dots), and  
 66 see a similar trend, except some modes have a significantly lower  $Q$ , likely due to spurious  
 67 two-level state (TLS) defects near the resonant frequency. The overall frequency dependence  
 68 is consistent with a resistive dissipation channel  $R_s$  in the wirebond interface, as shown inset  
 69 in Fig. S2. This could originate from a thick oxide barrier layer on the NbTi surface. For  
 70 simplicity, we assume the current of a standing cable mode follows a simple cosine shape  
 71 along the CPW line. In the wirebond interface, the current is  $I_0 \cos(\beta_c \ell_c)$  where  $I_0$  is the  
 72 current amplitude at the shorted end, and  $\beta_c$  is the propagation constant for the CPW line.  
 73 This current gives a power loss  $P_{\text{loss}} = I_0^2 \cos^2(\beta_c \ell_c) R_s$ , corresponding to a quality factor  
 74 of [7]

$$Q_{\text{loss}} = \omega_m \frac{L_m I_0^2}{P_{\text{loss}}} = \omega_m \frac{L_m}{\cos^2(\beta_c \ell_c) R_s}, \quad (\text{S1})$$

75 where  $\omega_m/2\pi$  is the standing mode frequency and  $L_m$  the lumped element inductance of the  
 76 mode (see section V). The  $Q$  of the standing mode is then given by

$$1/Q = 1/Q_{\text{loss}} + 1/Q_0, \quad (\text{S2})$$

77 where  $Q_0$  is the cable's intrinsic quality factor. Fitting this model with the cable test data,  
 78 we obtain  $R_s = 0.38 \Omega$  and  $Q_0 = 90.9 \times 10^3$ , shown by the grey line in Fig. S2.

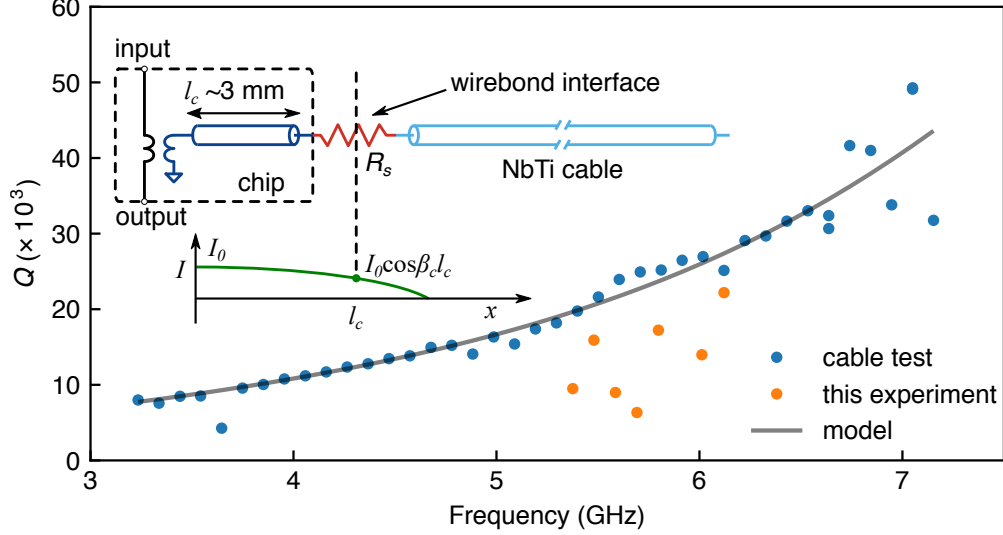

Figure S2. Channel loss from the wirebond connection. Inset: Schematic of independent measurement of coaxial cable loss, where the cable is wirebonded to a short CPW line of length  $\ell_c \sim 3$  mm on a test chip. The loss in the wirebond interface is modeled as a series resistance  $R_s$ . The current distribution of a standing mode is assumed to follow a simple cosine shape along the CPW line, ignoring the transition in the wirebond interface. Blue dots represent the  $Q$  of each standing mode measured in this experiment; orange dots are from experiments in main text. Grey line is numerical model with  $R_s = 0.38 \Omega$  and  $Q_0 = 90.9 \times 10^3$ .

79 In Ref. 8, Kurpiers *et al.* reported an intrinsic  $Q$  as high as  $92 \times 10^3$  for a NbTi coaxial  
 80 cable made by Keycom Corp., using capacitive coupling. In Ref. 9, a NbTi cable of the same  
 81 kind used in this experiment is capacitively-coupled to a 3D transmon qubit, where typical  
 82  $Q$ 's of order  $50 \times 10^3$  with occasional values as high as  $160 \times 10^3$  were observed. The cable  
 83 intrinsic  $Q$  values are quite similar, likely limited by the dielectric loss of PTFE at cryogenic  
 84 temperatures.

85 According to the model in Fig. S2, if we adjust the coupler circuit such that  $\ell_c \sim \lambda/4$ ,  
 86 where  $\lambda$  is the wavelength of the chip standing mode, then  $\cos(\beta_c \ell_c) \approx 0$ , minimizing the  
 87 loss through  $R_s$  for frequencies close to the resonant frequency of the  $\lambda/4$  transformer.  
 88 Alternatively, if we use a capacitive tunable coupler design [10], then the channel is open on  
 89 both ends, and the loss through  $R_s$  will be small, as long as  $\ell_c \ll \lambda/4$ . Another approach  
 90 is to minimize  $R_s$  by using an Al cable instead of NbTi, although cables clad in Al are not  
 91 easily available.

### 92 III. EXPERIMENTAL SETUP

93 A schematic of the room-temperature electronics and the cryogenic wiring is shown in  
94 Fig. S3, similar to that in Ref. 1. We use custom digital-to-analog converter (DAC) (dual-  
95 channel, 14-bit resolution, 1 GS/s sampling rate) and analog-to-digital converter (ADC)  
96 (dual-channel, 8-bit resolution, 1 GS/s sampling rate) circuit boards for qubit control and  
97 measurement, respectively. Each control signal output and measurement signal input chan-  
98 nel is filtered by a custom Gaussian low-pass filter with a  $-3$  dB bandwidth of about 250  
99 MHz.

100 The DAC boards can generate nanosecond-length pulses for fast qubit Z or coupler G  
101 control. The fast bias pulse is combined with a direct-current (DC) bias using a bias-tee at  
102 the 10 mK stage, where the DC bias line is filtered with an  $RC$  filter of  $\sim 1$  MHz bandwidth  
103 at the 4 K stage and a copper powder filter at the 10 mK stage. The DAC dual-channel  
104 output can also modulate the envelope of an IQ mixer for qubit XY rotations, or to drive  
105 the readout resonator for dispersive measurements. The modulation of the IQ mixer can  
106 provide arbitrary waveform output within  $\pm 250$  MHz of its local oscillator (LO) frequency.  
107 In this experiment, 4 LOs have been used to drive IQ mixers for different purposes, where  
108 an LO at 5.6 GHz (6 GHz) carrier frequency is used to control the qubits operating at about  
109 5.5 GHz (5.9 GHz), and an LO at 6.55 GHz (6.5 GHz) carrier frequency is used for the  
110 dispersive readout of node  $A$  (node  $B$ ) respectively.

111 The output of the readout microwave signal is first amplified by a traveling wave para-  
112 metric amplifier (TWPA) [11] at the 10 mK stage (node  $B$  does not have a TWPA for qubit  
113 readout), then amplified by a cryogenic high electron mobility transistor (Low Noise Fact-  
114 ory) at the 4 K stage. Two cryogenic circulators with low insertion loss are added between  
115 the TWPA and the cryogenic HEMT to block reflections and thermal noise emitted from the  
116 input of the cryogenic HEMT. An additional circulator is inserted between the TWPA drive  
117 line and the processor, to avoid any unexpected excitation of the qubits from the TWPA  
118 drive signal. The cryogenic HEMT output is further amplified by two room-temperature  
119 HEMT amplifiers (Miteq Corp.), then down-converted with an IQ mixer and captured by  
120 an ADC board.

121 The ADC board can perform on-board multi-channel demodulation of the captured wave-  
122 form, yielding a single complex value  $\tilde{I} + i\tilde{Q}$  in the phase space for each demodulation channel

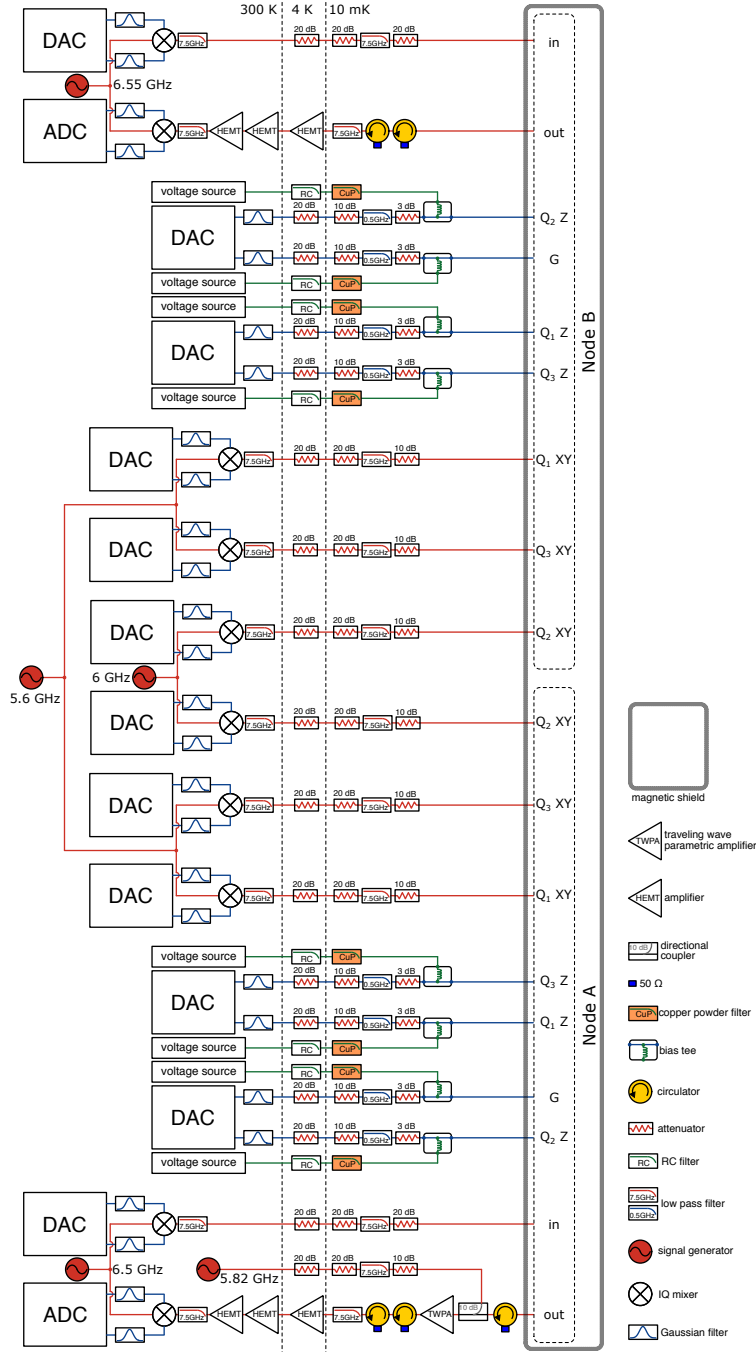

Figure S3. Schematic of the experimental setup.

123 from a single measurement. This allows for the simultaneous readout of multiple qubits us-  
 124 ing frequency multiplexing [12]. With calibrated discrimination criteria in the  $\tilde{I}-\tilde{Q}$  plane, a  
 125  $|g\rangle$  or  $|e\rangle$  state can be assigned to each  $\tilde{I}+i\tilde{Q}$  value. Repeating this single-shot measurement  
 126 several thousand times, we obtain the qubit state probabilities.



|         | $f_{eg}^{\max}$ (GHz) | $f_{eg}^{\text{idle}}$ (GHz) | $\eta$ (GHz) | $T_1$ ( $\mu\text{s}$ ) | $T_\phi$ ( $\mu\text{s}$ ) | $f_{rr}$ (GHz) | $\tau_{rr}$ (ns) | $F_g$ | $F_e$ |
|---------|-----------------------|------------------------------|--------------|-------------------------|----------------------------|----------------|------------------|-------|-------|
| $Q_1^A$ | 6.04                  | 5.5050                       | -0.23        | 12                      | 3.4                        | 6.5032         | 250              | 0.982 | 0.944 |
| $Q_2^A$ | 6.14                  | 5.870                        | -0.15        | 7                       | 3.8                        | 6.5490         | 350              | 0.981 | 0.935 |
| $Q_3^A$ | 6.03                  | 5.4882                       | -0.23        | 7                       | 3.8                        | 6.6045         | 300              | 0.985 | 0.942 |
| $Q_1^B$ | 6.08                  | 5.4655                       | -0.23        | 29                      | 4.2                        | 6.5065         | 300              | 0.995 | 0.955 |
| $Q_2^B$ | 6.25                  | 5.8950                       | -0.16        | 11                      | 4.4                        | 6.5560         | 450              | 0.973 | 0.947 |
| $Q_3^B$ | 6.16                  | 5.4835                       | -0.23        | 20                      | 2.9                        | 6.6095         | 300              | 0.984 | 0.953 |

Table S1. Qubit parameters. Here  $f_{eg}^{\max}$  is the qubit maximum frequency,  $f_{eg}^{\text{idle}}$  is the qubit idle frequency,  $\eta$  is the qubit nonlinearity,  $T_1$  and  $T_\phi$  are the qubit lifetime and pure dephasing time at the idle frequency respectively,  $f_{rr}$  is the readout resonator frequency,  $\tau_{rr}$  is the readout length,  $F_g$  and  $F_e$  are the readout fidelity of the  $|g\rangle$  and  $|e\rangle$  states respectively.

## 127 IV. DEVICE CHARACTERIZATION

### 128 A. Summary of device parameters

129 The parameters and typical performance of each qubit are summarized in Table S1. Note  
130 the linear inductance from the tunable coupler contributes to the total inductance of the  
131 qubit [13], reducing the maximum frequency of  $Q_2^n$  by a few hundred MHz. To counteract  
132 this effect, the size of  $Q_2^n$ 's Josephson junctions was increased by 10% compared to that  
133 of the other qubits. The linear inductance from the coupler also weakens the nonlinearity  
134 of  $Q_2^n$  by about 70 MHz [13], which in turn affects the dispersive shift [14]. The readout  
135 duration for  $Q_2^n$  is correspondingly increased to compensate for this effect.

136 To achieve a fast dispersive readout without introducing strong Purcell decay [15], we  
137 placed a Purcell filter between the readout resonators and the readout line. The Purcell  
138 filter is essentially a shorted half-wavelength coplanar waveguide resonator, similar to that  
139 used in Refs. 16–18. The filter has a resonant frequency of about 6.5 GHz, a weak coupling  
140 to the input port (coupling  $Q_c \sim 2000$ ) and a strong coupling to the output port (coupling  
141  $Q_c \sim 25$ ). With this element, we are able to perform high-fidelity qubit readout in about 300  
142 ns, even absent a TWPA or parametric amplifier [19]. The readout fidelity for the ground  
143 state  $|g\rangle$  is  $\sim 0.98$ , primarily limited by the separation error and spurious excitations [20].

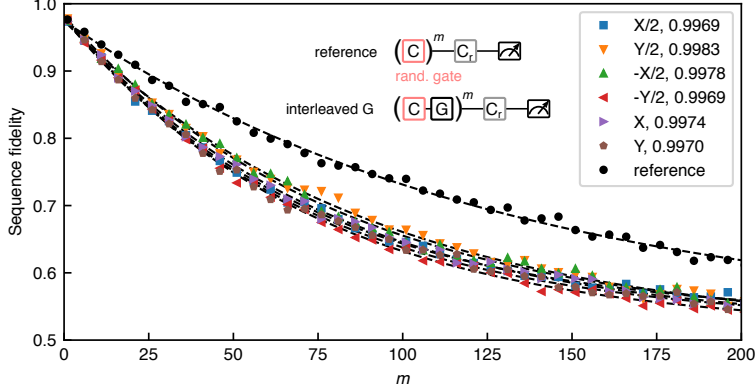

Figure S4. Single qubit randomized benchmarking for  $Q_1^A$ . Here  $C$  is a random Clifford gate and  $C_r$  is a Clifford gate that ideally restores the quantum state after the random gate sequence.

144 The readout fidelity of the excited state  $|e\rangle$  is  $\sim 0.95$ , primarily limited by the lifetime of  
 145 the qubit.

## 146 B. Single qubit gate characterization

147 We characterize the single qubit gate fidelities using Clifford-based randomized bench-  
 148 marking (RB) [21–24]. The Clifford group is a set of rotations that evenly samples the  
 149 Hilbert space, thus averaging across individual gate errors. For single-qubit RB, the Clifford  
 150 group  $C_1$  is the group of 24 rotations which preserve the octahedron in the Bloch sphere.  
 151 We follow the methods in the Supplementary of Ref. 24 and implement the  $C_1$  group with  
 152  $\pi$ ,  $\pi/2$  and  $2\pi/3$  rotations. A typical RB for  $Q_1^A$  is shown in Fig. S4. Table S2 summarizes  
 153 the typical single qubit gate fidelities for all qubits in this experiment.

## 154 C. iSWAP and CZ gates

155 The transition frequency diagram of the three qubits in each node is shown in Fig. S5a.  
 156 The central qubits  $Q_2^n$  ( $n = A, B$ ) operate with their  $g-e$  transition  $f_{eg}$  (blue) at  $\sim 5.9$  GHz,  
 157 while the other two qubits  $Q_{1,3}^n$  operate at  $f_{eg} \sim 5.5$  GHz (slightly detuned from one another).  
 158 The  $e-f$  transition  $f_{ef}$  (red) is around 5.9 GHz for  $Q_2^n$  and around 5.5 GHz for  $Q_{1,3}^n$ . With  
 159  $\sim 0.4$  GHz detuning ( $\sim 0.24$  GHz detuning between the  $|ee\rangle-|gf\rangle$  transition), the residual  
 160 coupling between adjacent qubits is very small. During the quantum state transfer operation,  
 161  $Q_2^n$  is tuned to 5.798 GHz to resonantly interact with the communication mode  $R$ . At this

|         | X/2    | -X/2   | Y/2    | -Y/2   | X      | Y      | average |
|---------|--------|--------|--------|--------|--------|--------|---------|
| $Q_1^A$ | 0.9969 | 0.9978 | 0.9983 | 0.9969 | 0.9974 | 0.9970 | 0.9974  |
| $Q_2^A$ | 0.9979 | 0.9969 | 0.9971 | 0.9980 | 0.9976 | 0.9973 | 0.9975  |
| $Q_3^A$ | 0.9987 | 0.9985 | 0.9988 | 0.9970 | 0.9953 | 0.9983 | 0.9978  |
| $Q_1^B$ | 0.9973 | 0.9990 | 0.9978 | 0.9976 | 0.9985 | 0.9981 | 0.9981  |
| $Q_2^B$ | 0.9982 | 0.9951 | 0.9965 | 0.9959 | 0.9937 | 0.9969 | 0.9961  |
| $Q_3^B$ | 0.9947 | 0.9968 | 0.9995 | 0.9967 | 0.9932 | 0.9983 | 0.9965  |

Table S2. Single qubit gate fidelities for all qubits in this experiment, as determined by randomized benchmarking.

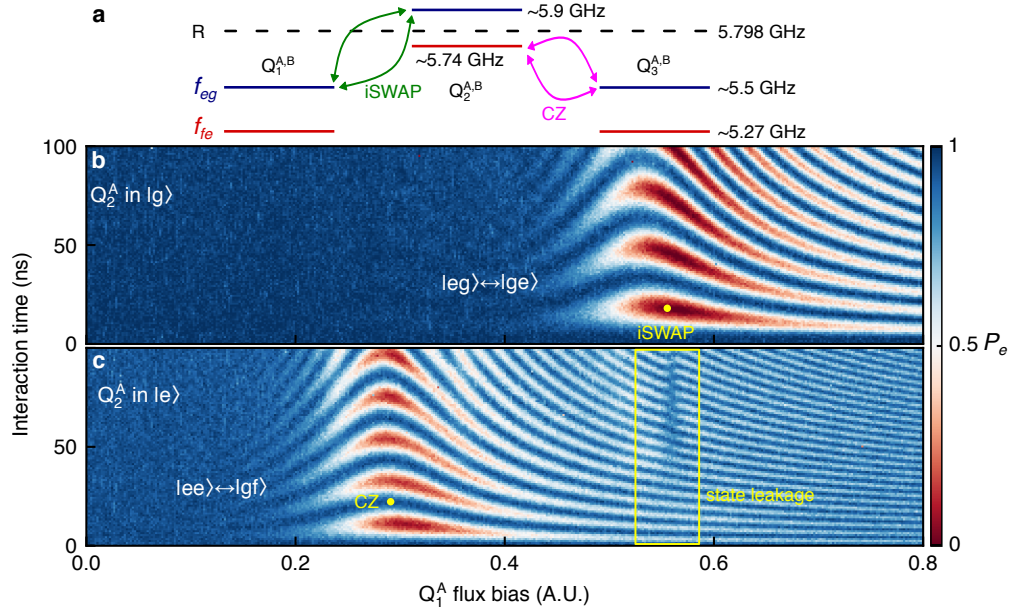

Figure S5. Implementation of two-qubit gates. **a**, Transition frequency diagram of the three qubits in each node, showing both the  $g - e$  ( $f_{ge}$ ) and  $e - f$  ( $f_{ef}$ ) transitions. The center qubits  $Q_2^n$  ( $n = A, B$ ) are operated at  $\sim 5.9$  GHz, and the side qubits  $Q_{1,3}^n$  are operated at  $\sim 5.5$  GHz. **b**, Vacuum Rabi oscillations for the two-qubit  $|eg\rangle - |ge\rangle$  transition between  $Q_1^A$  and  $Q_2^A$ . An iSWAP gate can be implemented by enabling this oscillation for a duration of 15 ns, as marked by the yellow dot. **c**, Vacuum Rabi oscillations for the two-qubit  $|ee\rangle - |gf\rangle$  transition between  $Q_1^A$  and  $Q_2^A$ . A CZ gate can be implemented by enabling this oscillation for a duration of 21 ns, as marked by the yellow dot.

162 frequency, the detuning between  $Q_2^n$  and the side qubits  $Q_{1,3}^n$  is not small enough to avoid  
 163 unwanted stray coupling, so we apply detuning pulses to  $Q_{1,3}^n$  to reduce their transition  
 164 frequencies by about 200 MHz during this process.

165 To swap a quantum state from  $Q_{1,3}^n$  to  $Q_2^n$  (initially in the  $|g\rangle$  state), we bias  $Q_{1,3}^n$  so its  
 166  $g - e$  transition is resonant with that of  $Q_2^n$ , initiating vacuum Rabi oscillation between the  
 167  $|eg\rangle$  and  $|ge\rangle$  states, as shown in Fig. S5b. The capacitive coupling between  $Q_2^n$  and  $Q_{1,3}^n$   
 168 can be accurately modeled by the Jaynes-Cummings Hamiltonian,

$$H_{j,2}^n/\hbar = g_{j,2}^n (\sigma_2^n \sigma_j^{n\dagger} + \sigma_2^{n\dagger} \sigma_j^n), \quad (\text{S3})$$

169 where  $\sigma_i^n$  is the annihilation operator for qubit  $Q_i^n$  and  $g_{j,2}/2\pi = 15.7$  MHz is the capacitive  
 170 coupling strength between  $Q_2^n$  and  $Q_{1,3}^n$ . Initiating this interaction for the appropriate time  
 171  $t$  will evolve the initial state  $|eg\rangle$  to the state  $|eg\rangle \rightarrow \cos(g_{j,2}^n t)|eg\rangle - i \sin(g_{j,2}^n t)|ge\rangle$ .

172 At  $t = \tau_{\text{swap}} = \pi/2g_{j,2}^n = 15$  ns,  $\cos(g_{j,2}^n t) = 0$ ,  $\sin(g_{j,2}^n t) = 1$ , we complete the  $|eg\rangle \rightarrow$   
 173  $-i|ge\rangle$  iSWAP process. Ideally, the  $|ee\rangle$  state is unchanged under this gate, but as shown in  
 174 Fig. S5c, due to the weak nonlinearity of  $Q_2^n$ , if both qubits are in the  $|e\rangle$  state, stray coupling  
 175 between the  $|gf\rangle$  state and the  $|ee\rangle$  state can cause state leakage during the iSWAP gate.  
 176 Fortunately, in this experiment, the receiver qubit is ideally always in its  $|g\rangle$  state when we  
 177 transfer states using the iSWAP gate, so this state leakage is not a concern here, but will  
 178 affect the quantum process tomography of the iSWAP gate. We therefore characterize the  
 179 iSWAP gate with a different method, as discussed below.

180 To characterize the transfer efficiency of the iSWAP gate, we compare the  $Q_2^n |e\rangle$  final  
 181 state probability  $P_e$  from two experiments: In one experiment, we apply a  $\pi$  pulse to  $Q_2^n$   
 182 directly, and then measure; in the other experiment, we apply a  $\pi$  pulse to  $Q_{1,3}^n$  and then  
 183 transfer the excitation to  $Q_2^n$  using an iSWAP gate, followed by measurement. These two  
 184 experiments are carried out back-to-back and repeated 1000 times. We compare the average  
 185  $\langle P_e \rangle$  from the two experiments, and find that the iSWAP gate has a transfer efficiency  
 186  $\eta_{\text{iSWAP}} \approx 0.99$ .

187 A controlled-phase gate (also called a controlled-Z or CZ gate) is a conditional two-qubit  
 188 gate, where typically the first qubit is the control qubit and the second qubit is the target  
 189 qubit. A Z gate  $\sigma_z$  is applied to the target qubit, conditional on the control qubit being in

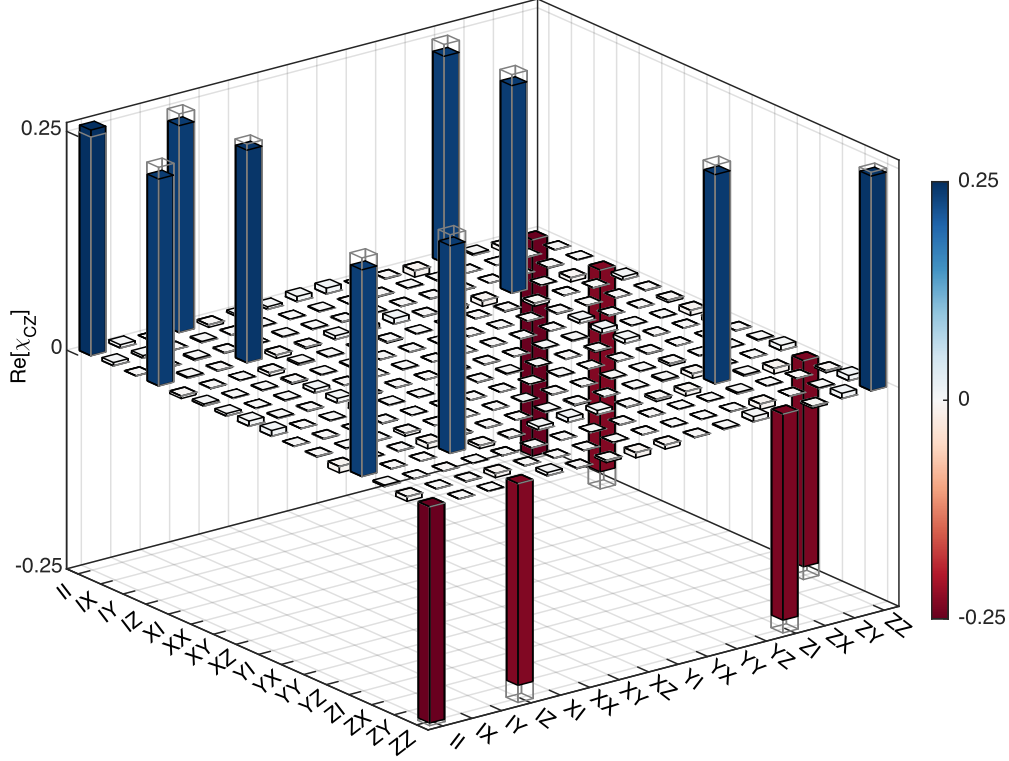

Figure S6. Quantum process tomography of the CZ gate between  $Q_1^A$  and  $Q_2^A$ . The solid color and gray outline bars are for the measured and ideal values respectively. The CZ gate has a process fidelity of  $0.958 \pm 0.007$ .

|                    | $Q_1^A - Q_2^A$ | $Q_3^A - Q_2^A$ | $Q_1^B - Q_2^B$ | $Q_3^B - Q_2^B$ | average  |
|--------------------|-----------------|-----------------|-----------------|-----------------|----------|
| $\mathcal{F}_{CZ}$ | 0.958(7)        | 0.945(8)        | 0.952(5)        | 0.944(7)        | 0.950(6) |

Table S3. CZ gate fidelities, determined by process tomography.

190 the state  $|e\rangle$ . The unitary operator for the CZ gate can be written as

$$U_{CZ} = \begin{pmatrix} 1 & 0 & 0 & 0 \\ 0 & 1 & 0 & 0 \\ 0 & 0 & 1 & 0 \\ 0 & 0 & 0 & -1 \end{pmatrix} = |g\rangle\langle g| \otimes \mathbb{I} + |e\rangle\langle e| \otimes \sigma_z. \quad (\text{S4})$$

191 From Eq. S4, we see that in fact there is no difference between the control and target  
 192 qubits for this gate, thus the circuit diagram for the CZ gate takes on its symmetric form  
 193 shown in Fig. S7.

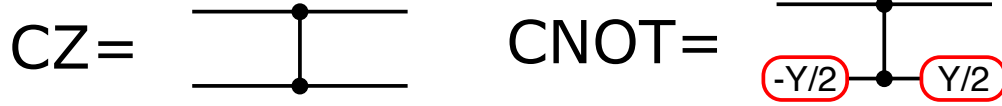

Figure S7. CZ and CNOT gate diagrams.

195 A controlled-NOT (CNOT) gate is another fundamental two-qubit gate, where an X gate  
 196  $\sigma_x$  is applied to the target qubit conditional on the control qubit being in the state  $|e\rangle$ . The  
 197 unitary operator for the CNOT gate can be written as

$$U_{CNOT} = \begin{pmatrix} 1 & 0 & 0 & 0 \\ 0 & 1 & 0 & 0 \\ 0 & 0 & 0 & 1 \\ 0 & 0 & 1 & 0 \end{pmatrix} = |g\rangle\langle g| \otimes \mathbb{I} + |e\rangle\langle e| \otimes \sigma_x. \quad (\text{S5})$$

198 For superconducting qubits, the CZ gate is more straightforward to implement than the  
 199 CNOT, where the latter can be realized by combining a CZ gate with two  $\pi/2$  rotations, as  
 200 shown in Fig. S7.

201 In the experiment here, the CZ gate here is implemented utilizing the  $|f\rangle$  state of  $Q_2^n$ ,  
 202 as proposed in Ref. 25 and demonstrated in Refs. 26 and 27. When biasing  $Q_{1,3}^n$  to be  
 203 resonant with the  $|e\rangle$ - $|f\rangle$  transition frequency of  $Q_2^n$ , a vacuum Rabi oscillation between the  
 204  $|ee\rangle$  and  $|gf\rangle$  state can be observed, as shown in Fig. S5c. If the interaction is turned on for  
 205  $\tau_{CZ} = \pi/\sqrt{2}g_{j,2}^n \approx 21$  ns,  $j = 1, 3$ , the quantum state completes an  $|ee\rangle \rightarrow -i|gf\rangle \rightarrow -|ee\rangle$   
 206 round trip and acquires a  $\pi$  phase relative to the other states, as required for this gate [25].

207 We perform quantum process tomography to characterize the CZ gate between  $Q_1^A$  and  
 208  $Q_2^A$  here, yielding the process matrix  $\chi_{CZ}$  shown in Fig. S6, with a process fidelity of  $\mathcal{F}_{CZ} =$   
 209  $\text{Tr}(\chi_{CZ} \cdot \chi_{CZ,\text{ideal}}) = 0.958 \pm 0.007$ , here  $\chi_{CZ,\text{ideal}}$  is the process matrix for the ideal CZ gate,  
 210 and the error bar is the standard deviation of repeated measurements. The fidelities of all  
 211 the CZ gates are summarized in Table S3, with an average fidelity of  $0.950 \pm 0.006$ , here the  
 212 error bar is the standard deviation of the four CZ gate fidelities.

213 In addition to quantum process tomography, randomized benchmarking (RB) can be used  
 214 to evaluate the CZ gate fidelity, as demonstrated in Refs. 24, 28–30. However, two-qubit  
 215 RB involves the two-qubit Clifford group  $C_2$ , which has 11,520 elements [24], making this  
 216 significantly more computationally and experimentally involved than single-qubit RB. More  
 217 recently, a simpler method called cross-entropy benchmarking (XEB) has been introduced

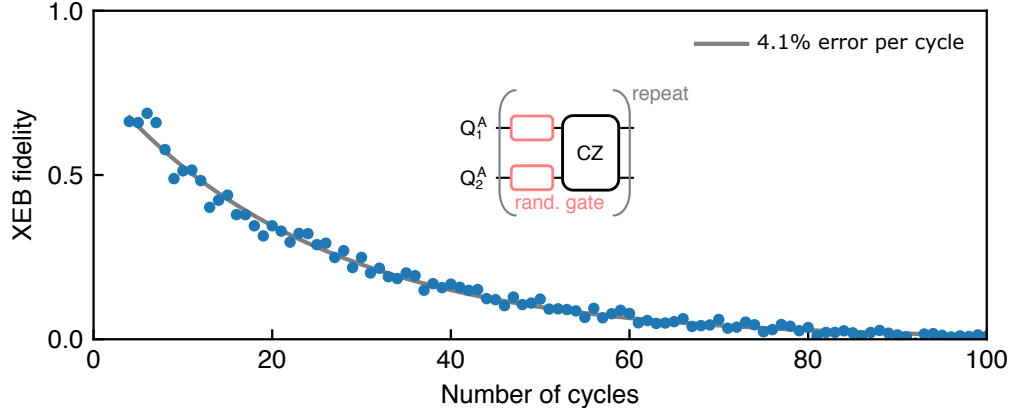

Figure S8. Cross-entropy benchmarking of the CZ gate, with an error of 4.1% per cycle.

218 to benchmark two-qubit gates [30], which interleaves the two-qubit gate with random single  
 219 qubit gates, as shown in Fig. S8 inset. In Fig. S8 we follow the Supplementary of Ref. 30 and  
 220 use the XEB technique to estimate the fidelity of the CZ gate, where we measure an error  
 221 of 4.1% per cycle. Subtracting the single-qubit gate errors, the CZ gate fidelity is 0.964, in  
 222 good agreement with the process tomography fidelity. Note that CZ gate fidelities  $> 0.99$   
 223 can be achieved with an optimized adiabatic gate [24, 31] or tunable coupling [13, 30, 32].

224 A dynamic phase is accumulated by each qubit when performing the two-qubit gates,  
 225 due to the change of the qubit frequency during the interaction. This dynamic phase can  
 226 be physically corrected by applying a calibrated Z rotation. Alternatively, to simplify the  
 227 control sequence, here we adjust the phase of the tomography pulses to correct for the  
 228 dynamic phase shift when performing quantum state tomography. Similarly, we adjust the  
 229 phase of the second  $Y/2$  gate on the target qubit to correct for the dynamic phase shift when  
 230 performing a CNOT gate.

#### 231 D. Flux crosstalk

232 There are 6 qubits and 2 tunable couplers in the quantum network measured here, each  
 233 of which has an independent flux control line. It is very important to mitigate the flux  
 234 crosstalk between these channels, to achieve the highest fidelity qubit control and state  
 235 transfer. First, we implemented a gradiometer design for the flux control line of each qubit,  
 236 in order to minimize the flux crosstalk, as shown in Fig. S9a and b. We then measured the  
 237 flux crosstalk between qubit pairs using Ramsey interference. We find that the crosstalk

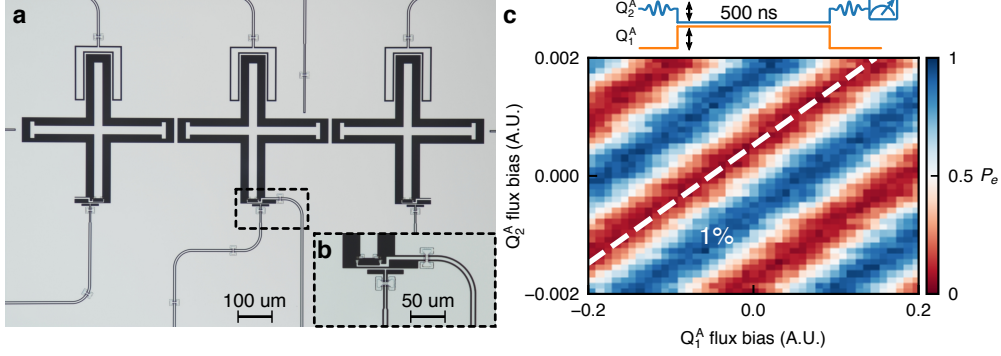

Figure S9. Measurement of qubit and coupler magnetic flux crosstalk. **a**, Xmon qubit design adopted from Ref. 33, with a gradiometer flux control line design. **b**, Magnified view of the flux control line design. **c**, Characterization of the flux crosstalk between  $Q_1^A$  and  $Q_2^A$ , using Ramsey interference. The control pulse sequence is shown on top, where the black double-headed arrows represent the effect of the control fluxes varied in the measurement. The white dashed line is a representative contour line of the data, along which the fluxes from the control lines for  $Q_1^A$  and  $Q_2^A$  cancel one another. The slope of this line, which is 1% here, represents the flux crosstalk between these two qubits.

238 between neighbouring qubits is about 1%, where a representative measurement is shown  
 239 in Fig. S9c. The flux crosstalk between the cable-coupled qubits  $Q_2^n$  and their adjustable  
 240 couplers  $G^m$  in each node is estimated to be 3-6%, using spectroscopy measurements (not  
 241 shown).

## 242 V. QUBIT-CABLE COUPLING

243 The  $\ell_{cb} = 1$  m long NbTi cable has a specific capacitance  $\mathcal{C}_{cb} = 96.2$  pF/m and a  
 244 specific inductance  $\mathcal{L}_{cb} = 240.5$  nH/m (as provided by the cable manufacturer). The cable is  
 245 galvanically connected to the tunable couplers by a short segment of CPW line of length  $\ell_c \approx$   
 246 2 mm patterned on each quantum processor die. The CPW line has a specific capacitance  
 247  $\mathcal{C}_{cpw} = 173$  pF/m and specific inductance  $\mathcal{L}_{cpw} = 402$  nH/m. The  $m^{\text{th}}$  standing mode in  
 248 the CPW-cable-CPW channel can be modeled as a lumped element series  $LC$  resonator [7],  
 249 with parameters given by

$$L_m \approx \frac{1}{2}(\mathcal{L}_{cb}\ell_{cb} + 2\mathcal{L}_{cpw}\ell_c) = 121 \text{ nH}, \quad (\text{S6})$$



$$\omega_m \approx m\omega_{\text{FSR}}, \quad (\text{S7})$$

$$C_m = \frac{1}{\omega_m^2 L_m}. \quad (\text{S8})$$

Each qubit  $Q_2^n$  ( $n = A, B$ ) is coupled to the channel via a tunable coupler  $G^n$  with the same design as in Ref. 1. This configuration is accurately modeled [13, 34] as a tunable inductance given by

$$M_c^n = \frac{L_g^2}{2L_g + L_w + L_T^n / \cos \delta^n}, \quad (\text{S9})$$

where  $\delta^n$  is the phase across the coupler Josephson junction,  $L_T^n$  is the coupler junction inductance at  $\delta^n = 0$ ,  $L_g = 0.2$  nH, and  $L_w \approx 0.1$  nH represents the stray wiring inductance, which cannot be ignored when  $L_T^n$  becomes very small [1].

In the harmonic limit and assuming weak coupling, the coupling between qubit  $Q_2^n$  and the  $m^{\text{th}}$  mode is [13, 34]

$$g_m^n = -\frac{M_c^n}{2} \sqrt{\frac{\omega_m \omega_2^n}{(L_g + L_q^n)(L_g + L_m)}}, \quad (\text{S10})$$

where  $L_q^n \approx 8.4$  nH is the qubit  $Q_2^n$  inductance and  $\omega_2^n/2\pi$  is  $Q_2^n$ 's operating frequency. We see that  $g_m^n \propto \sqrt{\omega_m} \propto \sqrt{m}$ , a well-known result for multi-mode coupling [35]. It is experimentally more practical to approximate the coupling by a single value  $g^n$ , because as the mode number  $m \sim 55 \gg 1$  near 5.8 GHz, the variation in  $g_m^n$  with  $m$  within the frequency range of interest is small.

To characterize the tunable couplers, we vary the coupler junction phase  $\delta^n$  and tune the qubit  $Q_2^n$  to resonantly interact with the communication mode  $R$ , as shown in Fig. S10a. The coupling strength  $g^n/2\pi$  versus  $\delta^n$  is shown in Fig. S10b, which is obtained by fitting a series of vacuum Rabi oscillations similar to Fig. S10a (for details of the fitting, see Section VI). We fit the analytical model, Eq. (S10), to the data in Fig. S10b, and find that  $L_T^A = 0.620$  nH and  $L_T^B = 0.625$  nH. Maximum coupling occurs at the junction phase  $\delta^n = \pi$ , where  $g_{\text{max}}^A/2\pi \approx 29$  MHz and  $g_{\text{max}}^B/2\pi \approx 28$  MHz. The coupling can be turned off by setting  $\delta^n = \pi/2$ , making  $L_T^n / \cos \delta^n$  very large.

It can be seen from Fig. S10a that the envelope of the vacuum Rabi oscillation decays faster as the coupling strength increases. This is attributed to the lossy wirebond interface, which not only introduces dissipation to the communication channel, but also affects the qubit coherence. Here we use a phenomenological model, shown at the top of Fig. S10c, to characterize the qubit loss at different coupling strengths, where we simply assume a

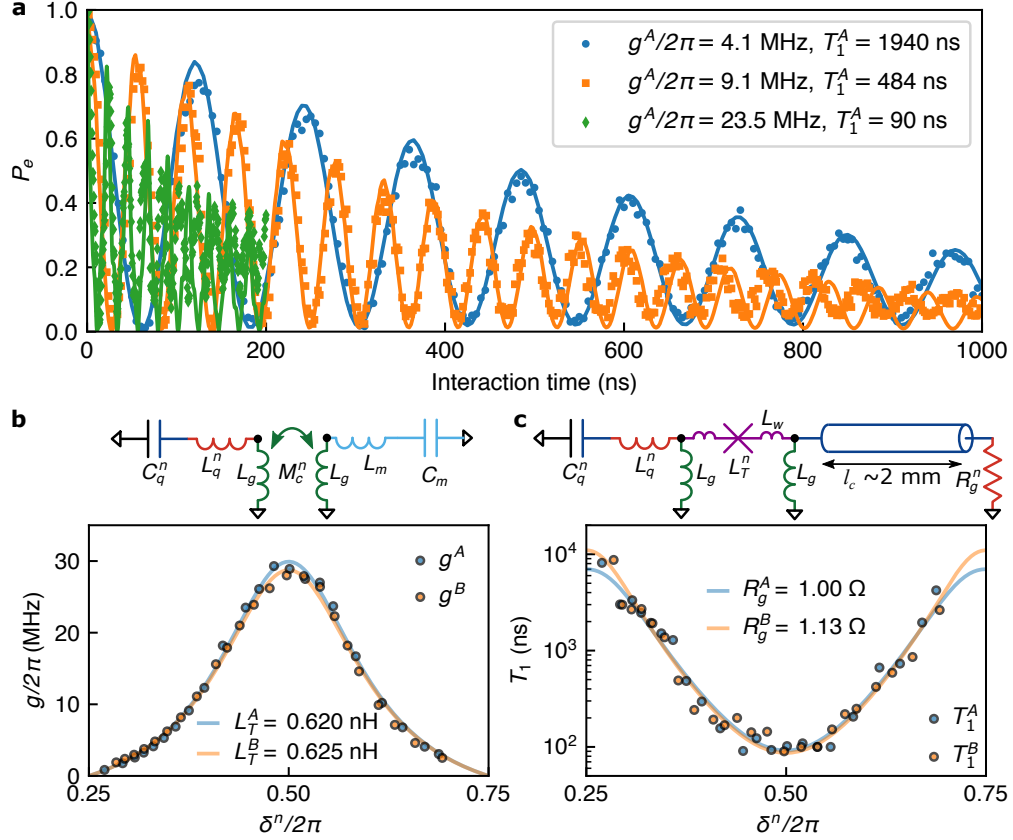

Figure S10. Tunable coupler characterization. **a**, Vacuum Rabi oscillations between qubit  $Q_2^A$  and the communication mode  $R$  at different coupling strength  $g^A/2\pi$ . Fitting the data gives  $g^A/2\pi$  and the qubit lifetime  $T_1^A$  during the interaction. **b**,  $g^n/2\pi$  versus  $\delta^n$ . Top: lumped-element linear circuit model for the inductive coupling between the qubit  $Q_2^n$  and the communication mode  $R$ , which is modeled as a series  $LC$  resonator. **c**,  $Q_2^n$  lifetime  $T_1^n$  versus  $\delta^n$  during the interaction. Top: phenomenological circuit model for calculating the qubit loss, assuming a loss channel  $R_g^n$  shunting the wirebond connection to ground.

276 lumped resistor  $R_g^n$  shunting the wirebond interface to ground. We fit the model with the  
 277 measured qubit  $T_1^n$  (log scale), and find that the model agrees very well with the data, with  
 278  $R_g^A = 1.00$   $\Omega$  and  $R_g^B = 1.13$   $\Omega$ .

279 **VI. NUMERICAL SIMULATIONS**

280 The full quantum system can be modeled with the following rotating-frame, multi-qubit,  
 281 multi-mode communication channel Hamiltonian:

$$\begin{aligned}
 H/\hbar = & \sum_{i=1,2,3}^{n=A,B} \Delta\omega_i^n \sigma_i^{n\dagger} \sigma_i^n + \sum_{m=1}^M \left( m - \frac{M+1}{2} \right) \omega_{\text{FSR}} a_m^\dagger a_m \\
 & + \sum_{n=A,B} \sum_{j=1,3} g_{j,2}^n (\sigma_2^n \sigma_j^{n\dagger} + \sigma_2^{n\dagger} \sigma_j^n) \\
 & + \sum_{m=1}^M g^A (\sigma_2^A a_m^\dagger + \sigma_2^{A\dagger} a_m) + \sum_{m=1}^M (-1)^m g^B (\sigma_2^B a_m^\dagger + \sigma_2^{B\dagger} a_m),
 \end{aligned} \tag{S11}$$

282 where  $\sigma_i^n$  and  $a_m$  are the annihilation operators for qubit  $Q_i^n$  and the  $m^{\text{th}}$  standing-wave  
 283 mode respectively,  $\Delta\omega_i^n$  is the qubit frequency detuning with respect to the rotating frame  
 284 frequency, and  $M$  is the number of standing modes included in the simulation (always chosen  
 285 to be an odd number). The rotating frame frequency is set at the center of the standing-  
 286 mode frequencies, i.e. for mode number  $m = (M+1)/2$ . Note the sign of  $g^B$  alternates  
 287 with the mode number  $m$  due to the parity dependence of the standing wave mode [36, 37].  
 288 In this experiment, not all components are involved simultaneously, and in certain cases the  
 289 full Hamiltonian can be simplified.

290 In Fig. 2b in the main text, where only  $Q_2^A$  and the standing modes are interacting, the  
 291 Hamiltonian can be simplified to

$$H/\hbar = \sum_{m=1}^M \left( m - \frac{M+1}{2} \right) \omega_{\text{FSR}} a_m^\dagger a_m + \sum_{m=1}^M g^A (\sigma_2^A a_m^\dagger + \sigma_2^{A\dagger} a_m), \tag{S12}$$

292 where we choose  $M = 5$  standing modes, with the third mode  $m = 3$  the communication  
 293 mode  $R$ , and  $Q_2^A$  is assumed to be on resonant with  $R$  such that  $\Delta\omega_2^A = 0$ . Decoherence  
 294 is taken into account using the Lindblad master equation. The quantum state evolution  
 295 is calculated using QuTiP [38]. The five standing modes included in the model here have  
 296 measured lifetimes of 256 ns, 177 ns, 473 ns, 200 ns, and 370 ns respectively. We first  
 297 compare the numerical simulations using the qubit intrinsic lifetime  $T_1 = 7$  us, and find  
 298 discrepancies with the data (see the grey line in Fig. 2b of the main text). As discussed  
 299 in Section II, the loss in the channel is dominated by the wirebond interface. Changing  
 300 the coupler inductance does not change the participation of the lossy wirebond interface in  
 301 the channel, so the lifetime of the standing modes should not be affected by the coupling

302 strength. On the other hand, when the coupling is turned on, the qubit is exposed to the lossy  
 303 wirebond interface, introducing a new loss channel to the qubit coherence. This unwanted  
 304 side-effect is characterized by the phenomenological circuit model shown in Section V. We  
 305 fit the master equation simulation to the experimental data and find that the qubit  $T_1$  is  
 306 decreased to  $1.4 \mu\text{s}$  during the interaction (red line in Fig. 2b in the main text). Similarly,  
 307 we fit a series of vacuum Rabi oscillations, as shown in Fig. S10a, to obtain the coupling  
 308 strength  $g^n/2\pi$  (Fig. S10b) and the qubit lifetime  $T_1^n$  (Fig. S10c) at different coupler junction  
 309 phases  $\delta^n$ .

310 In Fig. 2c in the main text, where the side qubits  $Q_{1,3}^n$  are tuned far in frequency from  
 311  $Q_2^n$ , the state transfer process can be modeled with the simplified Hamiltonian:

$$\begin{aligned}
 H/\hbar = & \sum_{n=A,B} \Delta\omega_2^n \sigma_2^{n\dagger} \sigma_2^n + \sum_{m=1}^M \left( m - \frac{M+1}{2} \right) \omega_{\text{FSR}} a_m^\dagger a_m \\
 & + \sum_{m=1}^M g^A \left( \sigma_2^A a_m^\dagger + \sigma_2^{A\dagger} a_m \right) + \sum_{m=1}^M (-1)^m g^B \left( \sigma_2^B a_m^\dagger + \sigma_2^{B\dagger} a_m \right),
 \end{aligned}
 \tag{S13}$$

312 where we include  $M = 5$  standing modes in the simulations, and  $R$  is the third mode,  $m = 3$ .  
 313 Ideally, for the hybrid state transfer scheme [39], both qubits  $Q_2^n$  should be resonant with  $R$ ,  
 314 such that  $\Delta\omega_2^n = 0$ , and the coupling  $g^A$  and  $g^B$  should be set to the same coupling strength  
 315  $g_0$  simultaneously for a duration  $\tau$ . In the experiment, we vary the qubit frequencies as well  
 316 as the relative amplitude and delay between  $g_A$  and  $g_B$ , to optimize the transfer fidelity. It is  
 317 found that a higher fidelity is achieved with a delay of  $\Delta\tau = 13$  ns between the initial turn-on  
 318 for  $g_A$  and  $g_B$  (in other words, both  $g_A$  and  $g_B$  are turned on for a duration of  $\tau$ , but  $g^B$  is  
 319 turned on 13 ns later than  $g^A$ ). With this experimentally-optimized  $\Delta\tau$ , we fit the model to  
 320 the data shown in Fig. 2c in the main text, and find that  $\Delta\omega_2^A/2\pi = -0.95$  MHz,  $\Delta\omega_2^B/2\pi =$   
 321  $-1.79$  MHz,  $g_A/2\pi = 4.08$  MHz and  $g_B/2\pi = 4.06$  MHz (these are the parameters for the  
 322 grey line in Fig. 2c in the main text).

323 In Fig. 3b of the main text, the numerical  $\rho^A$  is calculated using the CZ gate process  
 324 matrix  $\chi_{\text{CZ}}$  measured in Section IV C, assuming the single-qubit rotation gates are ideal  
 325 (using their measured fidelities has almost no impact on the results). The numerical GHZ  
 326 state fidelity is 0.938, agreeing well with the experiment. The prepared GHZ state fidelity  
 327 is primarily limited by the CZ gate fidelity, which could be improved by using an optimized  
 328 adiabatic gate [24, 31] or using tunable coupling [13, 30, 32]. Some one-step GHZ state  
 329 preparation methods utilizing a common bus resonator may also be able to prepare high-

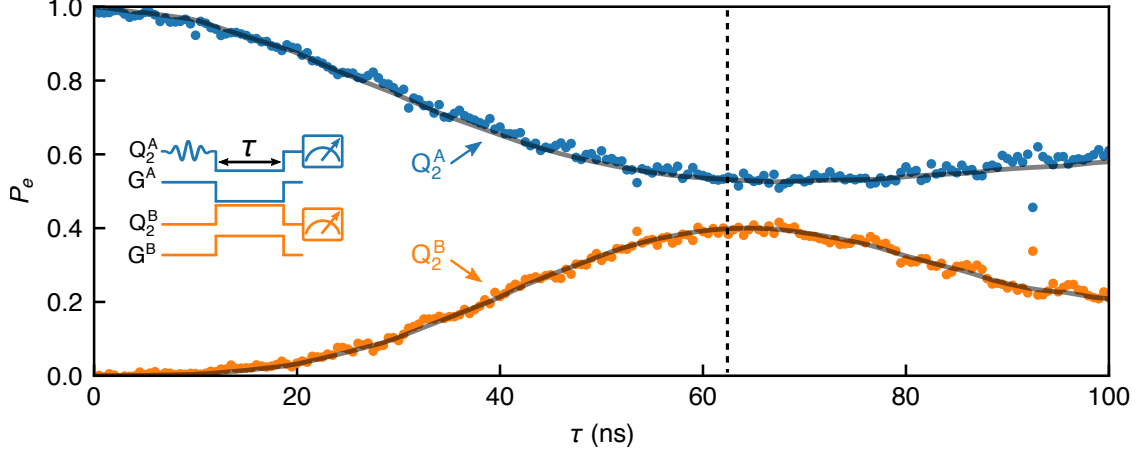

Figure S11. The “ST/2” process, where half a photon is sent from node  $A$  to node  $B$ . The control pulse sequence here is similar to that in Fig. 2c in the main text, except the coupling strength  $g^A$  and  $g^B$ , the interaction time  $\tau$  and the delay  $\Delta\tau$ , are experimentally tuned to optimize the Bell state fidelity. The dashed line marks the point where the Bell state fidelity is optimal.

330 fidelity GHZ states [40, 41]. In Fig. 3c of the main text, the numerical  $\rho^B$  is calculated by  
 331 applying the state transfer process  $\chi^{\otimes 3}$  and the decoherence process to  $\rho^A$  from Fig. 3b.  
 332 The fidelity of  $\rho^B$  is primarily limited by the state transfer fidelity  $\mathcal{F}^p$ , which might be  
 333 improved by optimizing the coupler circuit design or using a coaxial cable made with different  
 334 superconducting material, e.g. aluminium, as discussed in Section II.

335 In Fig. 4b in the main text, the control pulse for “ST/2” is similar to that for “ST” as  
 336 shown in Fig. 2c inset, except the coupling strength  $g^A$  and  $g^B$ , the interaction time  $\tau$  and  
 337 the delay  $\Delta\tau$ , are experimentally tuned to optimize the Bell state fidelity. With  $\Delta\tau = 5$  ns,  
 338 as determined experimentally, we fit the data in Fig. S11, which is similar to Fig.2c in  
 339 the main text, and obtain  $\Delta\omega_2^A/2\pi = 4.7$  MHz,  $\Delta\omega_2^B/2\pi = 5.4$  MHz,  $g_A/2\pi = 2.89$  MHz  
 340 and  $g_B/2\pi = 6.11$  MHz. The numerical Bell state fidelity is 0.915, agreeing well with the  
 341 experiment. This Bell state fidelity is primarily limited by the channel loss.

342 In Fig. 4c, we calculate the theoretical  $\rho_{II}$  by applying  $\chi_{CZ}$  (measured in Section IV C)  
 343 to  $\rho_I$  from Fig. 4b, assuming the single qubit rotation gates are ideal.

344 In Fig. 4d, we calculate the theoretical  $\rho_{III}$  by applying  $\chi_{CZ}$  and decoherence process to  
 345  $\rho_{II}$  from Fig. 4c, again assuming the single-qubit rotation gates are ideal. The decoherence  
 346 process is applied to  $Q_1^n$  to account for the idling of 70 ns during the application of CNOT  
 347 gates to  $Q_3^n$ . The fidelity of  $\rho_{II}$  and  $\rho_{III}$  is primarily limited by the fidelity of  $\rho_I$  and the CZ

348 gates.

- 
- 349 [1] Zhong, Y. P. *et al.* Violating Bell’s inequality with remotely connected superconducting qubits.  
350 *Nature Physics* **15**, 741–744 (2019).
- 351 [2] Kelly, J. S. *Fault-tolerant superconducting qubits*. Ph.D. thesis, University of California Santa  
352 Barbara (2015).
- 353 [3] Dunsworth, A. *et al.* A method for building low loss multi-layer wiring for superconducting  
354 microwave devices. *Applied Physics Letters* **112**, 063502 (2018).
- 355 [4] Dolan, G. J. Offset masks for lift-off photoprocessing. *Applied Physics Letters* **31**, 337–339  
356 (1977).
- 357 [5] Dunsworth, A. *et al.* Characterization and reduction of capacitive loss induced by sub-micron  
358 Josephson junction fabrication in superconducting qubits. *Applied Physics Letters* **111**, 022601  
359 (2017).
- 360 [6] Megrant, A. *et al.* Planar superconducting resonators with internal quality factors above one  
361 million. *Applied Physics Letters* **100**, 113510 (2012).
- 362 [7] Pozar, D. M. *Microwave engineering* (Wiley, 2011), fourth edn.
- 363 [8] Kurpiers, P., Walter, T., Magnard, P., Salathe, Y. & Wallraff, A. Characterizing the attenu-  
364 ation of coaxial and rectangular microwave-frequency waveguides at cryogenic temperatures.  
365 *EPJ Quantum Technology* **4**, 1–15 (2017).
- 366 [9] Burkhardt, L. D. *et al.* Error-detected state transfer and entanglement in a superconducting  
367 quantum network. *arXiv preprint arXiv:2004.06168* (2020).
- 368 [10] Yan, F. *et al.* Tunable coupling scheme for implementing high-fidelity two-qubit gates. *Physical*  
369 *Review Applied* **10**, 054062 (2018).
- 370 [11] Macklin, C. *et al.* A near-quantum-limited Josephson traveling-wave parametric amplifier.  
371 *Science* **350**, 307–310 (2015).
- 372 [12] Chen, Y. *et al.* Multiplexed dispersive readout of superconducting phase qubits. *Applied*  
373 *Physics Letters* **101**, 182601 (2012).
- 374 [13] Chen, Y. *et al.* Qubit architecture with high coherence and fast tunable coupling. *Physical*  
375 *Review Letters* **113**, 220502 (2014).
- 376 [14] Koch, J. *et al.* Charge-insensitive qubit design derived from the Cooper pair box. *Physical*  
377 *Review A* **76**, 042319 (2007).

- 378 [15] Houck, A. *et al.* Controlling the spontaneous emission of a superconducting transmon qubit.  
379 *Physical Review Letters* **101**, 080502 (2008).
- 380 [16] Satzinger, K. J. *et al.* Quantum control of surface acoustic-wave phonons. *Nature* **563**, 661–665  
381 (2018).
- 382 [17] Bienfait, A. *et al.* Phonon-mediated quantum state transfer and remote qubit entanglement.  
383 *Science* **364**, 368–371 (2019).
- 384 [18] Jeffrey, E. *et al.* Fast accurate state measurement with superconducting qubits. *Physical*  
385 *Review Letters* **112**, 190504 (2014).
- 386 [19] Vijay, R., Slichter, D. & Siddiqi, I. Observation of quantum jumps in a superconducting  
387 artificial atom. *Physical Review Letters* **106**, 110502 (2011).
- 388 [20] Walter, T. *et al.* Rapid high-fidelity single-shot dispersive readout of superconducting qubits.  
389 *Physical Review Applied* **7**, 054020 (2017).
- 390 [21] Ryan, C., Laforest, M. & Laflamme, R. Randomized benchmarking of single-and multi-qubit  
391 control in liquid-state NMR quantum information processing. *New Journal of Physics* **11**,  
392 013034 (2009).
- 393 [22] Brown, K. R. *et al.* Single-qubit-gate error below  $10^{-4}$  in a trapped ion. *Physical Review A*  
394 **84**, 030303 (2011).
- 395 [23] Magesan, E. *et al.* Efficient measurement of quantum gate error by interleaved randomized  
396 benchmarking. *Physical Review Letters* **109**, 080505 (2012).
- 397 [24] Barends, R. *et al.* Superconducting quantum circuits at the surface code threshold for fault  
398 tolerance. *Nature* **508**, 500–503 (2014).
- 399 [25] Strauch, F. W. *et al.* Quantum logic gates for coupled superconducting phase qubits. *Physical*  
400 *Review Letters* **91**, 167005 (2003).
- 401 [26] DiCarlo, L. *et al.* Preparation and measurement of three-qubit entanglement in a supercon-  
402 ducting circuit. *Nature* **467**, 574–578 (2010).
- 403 [27] Yamamoto, T. *et al.* Quantum process tomography of two-qubit controlled-Z and controlled-  
404 NOT gates using superconducting phase qubits. *Physical Review B* **82**, 184515 (2010).
- 405 [28] Gaebler, J. P. *et al.* Randomized benchmarking of multiqubit gates. *Physical Review Letters*  
406 **108**, 260503 (2012).
- 407 [29] Córcoles, A. D. *et al.* Process verification of two-qubit quantum gates by randomized bench-  
408 marking. *Physical Review A* **87**, 030301 (2013).



- 409 [30] Arute, F. *et al.* Quantum supremacy using a programmable superconducting processor. *Nature*  
410 **574**, 505–510 (2019).
- 411 [31] Martinis, J. M. & Geller, M. R. Fast adiabatic qubit gates using only  $\sigma_z$  control. *Physical*  
412 *Review A* **90**, 022307 (2014).
- 413 [32] Xu, Y. *et al.* High-fidelity, high-scalability two-qubit gate scheme for superconducting qubits.  
414 *Physical Review Letters* **125**, 240503 (2020).
- 415 [33] Barends, R. *et al.* Coherent Josephson qubit suitable for scalable quantum integrated circuits.  
416 *Physical Review Letters* **111**, 080502 (2013).
- 417 [34] Geller, M. R. *et al.* Tunable coupler for superconducting Xmon qubits: Perturbative nonlinear  
418 model. *Physical Review A* **92**, 012320 (2015).
- 419 [35] Sundaresan, N. M. *et al.* Beyond strong coupling in a multimode cavity. *Physical Review X*  
420 **5**, 021035 (2015).
- 421 [36] Pellizzari, T. Quantum networking with optical fibres. *Physical Review Letters* **79**, 5242  
422 (1997).
- 423 [37] Vogell, B., Vermersch, B., Northup, T., Lanyon, B. & Muschik, C. Deterministic quantum  
424 state transfer between remote qubits in cavities. *Quantum Science and Technology* **2**, 045003  
425 (2017).
- 426 [38] Johansson, J., Nation, P. & Nori, F. QuTiP: An open-source Python framework for the  
427 dynamics of open quantum systems. *Computer Physics Communications* **183**, 1760–1772  
428 (2012).
- 429 [39] Wang, Y.-D. & Clerk, A. A. Using dark modes for high-fidelity optomechanical quantum state  
430 transfer. *New Journal of Physics* **14**, 105010 (2012).
- 431 [40] Zheng, S.-B. One-step synthesis of multiatom Greenberger-Horne-Zeilinger states. *Physical*  
432 *Review Letters* **87**, 230404 (2001).
- 433 [41] Song, C. *et al.* 10-qubit entanglement and parallel logic operations with a superconducting  
434 circuit. *Physical Review Letters* **119**, 180511 (2017).
